# Supplementary material for: Serum 25-Hydroxyvitamin D Concentrations and Incidence of Age-Related Macular Degeneration: The Atherosclerosis Risk in Communities Study
Source: PubMed Central journal article supplement — Invest Ophthalmol Vis Sci. 2019 Apr;60(5):1362–71. doi: 10.1167/iovs.18-25945 (PMC6892376; doi:10.1167/iovs.18-25945), 2019-04
Supplement: iovs-60-04-32_s01.pdf [file iovs-60-04-32_s01.pdf]

**Supplemental Table 1:** Characteristics\* of study sample included in this analysis (n=1,225) compared to excluded participants attending visit 3 (n=10,866): the ARIC Study

| Characteristics                                      | N      | Included      | Excluded       | p-value |
|------------------------------------------------------|--------|---------------|----------------|---------|
| <b>Total</b>                                         | 12,091 | 1,225 (10.1%) | 10,866 (89.9%) | ---     |
| Season-adjusted serum 25(OH)D, mean (SD)             | 10,890 | 63.1 (20.1)   | 61.4 (21.2)    | 0.005   |
| Prevalent early AMD at visit 3, n (%) <sup>†</sup>   | 564    | 54 (4.5%)     | 510 (5.3%)     | 0.228   |
| <b>DEMOGRAPHICS</b>                                  |        |               |                |         |
| Age (years), mean (SD)                               | 11,897 | 55.6 (5.0)    | 57.2 (5.8)     | <0.001  |
| Sex, n (% women)                                     | 6,637  | 711 (58.0%)   | 5926 (54.5%)   | 0.019   |
| Race, n (% Caucasian)                                | 9,373  | 1029 (84.0%)  | 8344 (76.8%)   | <0.001  |
| Field center, n (%)                                  |        |               |                | <0.001  |
| <i>Forsyth County, NC</i>                            | 3168   | 135 (11.0%)   | 3033 (28.4%)   |         |
| <i>Jackson, MS</i>                                   | 2240   | 185 (15.1%)   | 2055 (19.3%)   |         |
| <i>Minneapolis, MN</i>                               | 3303   | 430 (35.1%)   | 2873 (26.9%)   |         |
| <i>Washington County, MD</i>                         | 3186   | 475 (38.8%)   | 2711 (25.4%)   |         |
| Education, n (%) - visit 1 <sup>‡</sup>              |        |               |                | <0.001  |
| <i>Basic or 0 years</i>                              | 2466   | 144 (11.8%)   | 2322 (21.4%)   |         |
| <i>Intermediate</i>                                  | 5044   | 545 (44.5%)   | 4499 (41.5%)   |         |
| <i>Advanced</i>                                      | 4563   | 536 (43.8%)   | 4027 (37.1%)   |         |
| <b>HEALTH &amp; LIFESTYLE CHARACTERISTICS</b>        |        |               |                |         |
| Health insurance, n (% yes)                          | 10,979 | 1161 (94.8%)  | 9818 (92.1%)   | 0.003   |
| Smoking status, n (%)                                |        |               |                | <0.001  |
| <i>Current</i>                                       | 2477   | 178 (14.5%)   | 2299 (21.6%)   |         |
| <i>Former</i>                                        | 4594   | 463 (37.8%)   | 4131 (38.8%)   |         |
| <i>Never</i>                                         | 4811   | 584 (47.7%)   | 4227 (39.7%)   |         |
| Drinking status, n (%)                               |        |               |                | <0.001  |
| <i>Current</i>                                       | 6873   | 814 (66.4%)   | 6059 (56.8%)   |         |
| <i>Former</i>                                        | 2391   | 178 (14.5%)   | 2213 (20.8%)   |         |
| <i>Never</i>                                         | 2617   | 233 (19.0%)   | 2384 (22.4%)   |         |
| Waist circumference (cm), mean (SD)                  | 11,886 | 96.4 (13.5)   | 98.1 (14.3)    | <0.001  |
| Waist to hip ratio, mean (SD)                        | 11,886 | 0.92 (0.08)   | 0.93 (0.08)    | <0.001  |
| BMI category (kg/m <sup>2</sup> ), n (%)             |        |               |                | 0.01    |
| <i>Under/normal weight (&lt;25 kg/m<sup>2</sup>)</i> | 3,693  | 378 (30.9%)   | 3315 (31.1%)   |         |
| <i>Overweight (25-30 kg/m<sup>2</sup>)</i>           | 4,783  | 536 (43.8%)   | 4247 (39.9%)   |         |
| <i>Obese (≥30 kg/m<sup>2</sup>)</i>                  | 3,405  | 311 (25.4%)   | 3094 (29.0%)   |         |
| Diastolic blood pressure (mm Hg), mean (SD)          | 11,895 | 72.1 (9.5)    | 71.9 (10.2)    | 0.517   |

**Supplemental Table 1:** Characteristics\* of study sample included in this analysis (n=1,225) compared to excluded participants attending visit 3 (n=10,866): the ARIC Study

| Characteristics                              | N      | Included      | Excluded       | p-value |
|----------------------------------------------|--------|---------------|----------------|---------|
| <b>Total</b>                                 | 12,091 | 1,225 (10.1%) | 10,866 (89.9%) | ---     |
| Systolic blood pressure (mm Hg), mean (SD)   | 11894  | 117.7 (15.9)  | 121.5 (18.6)   | <0.001  |
| Hypertension, n (% yes) §                    | 4118   | 305 (25.0%)   | 3813 (35.8%)   | <0.001  |
| Total cholesterol (mg/dL), mean (SD)         | 11838  | 208.8 (37.5)  | 209.7 (38.9)   | 0.433   |
| HDL (mg/dL), mean (SD)                       | 11803  | 50.8 (16.4)   | 49.3 (16.7)    | 0.003   |
| LDL (mg/dL), mean (SD)                       | 11636  | 131.7 (34.0)  | 133.5 (36.5)   | 0.083   |
| Triglycerides (mg/dL), mean (SD)             | 11836  | 132.6 (81.9)  | 135.7 (84.6)   | 0.223   |
| Glucose (mg/dL), mean (SD)                   | 11862  | 105.4 (26.0)  | 114.2 (43.2)   | <0.001  |
| Hormone use (among females), n (%)           |        |               |                | <0.001  |
| <i>Current estrogen user</i>                 | 1134   | 132 (21.4%)   | 1002 (20.6%)   |         |
| <i>Current estrogen &amp; progestin user</i> | 565    | 93 (15.1%)    | 472 (9.7%)     |         |
| <i>Never used hormones</i>                   | 3496   | 363 (58.8%)   | 3133 (64.3%)   |         |
| <i>Former hormone user</i>                   | 293    | 29 (4.7%)     | 264 (5.4%)     |         |

\* Characteristics assessed at visit 2 unless otherwise noted.

† % Early AMD at visit 3, n (%) determined using the grading system as defined in the paper by Millen et al. (38)

†† Education defined as Basic or 0 years ( $\leq 11$  years or less, i.e., high school with no degree or less), Intermediate (12-16 years, i.e., high school graduate or vocational school), Advanced (17-21 years, i.e., college or higher).

§ Average systolic blood pressure  $\geq 140$  mm Hg, or diastolic  $\geq 90$  mm Hg, or high blood pressure medication use in the past 2 weeks.
